# Supplementary material for: Factors associated with return to work among people on work absence due to long-term neck or back pain: a narrative systematic review
Source: PubMed Central journal article supplement — BMJ Open. 2017 Jul 2;7(6):e014939. doi: 10.1136/bmjopen-2016-014939 (PMC5734441; doi:10.1136/bmjopen-2016-014939), 2017-07-02
Supplement: bmjopen-2016-014939supp001.pdf [file bmjopen-2016-014939supp001.pdf]

## Appendix- I

### Search history from PubMed:

| Search                            | Search words                                                                                                     | No. of articles |
|-----------------------------------|------------------------------------------------------------------------------------------------------------------|-----------------|
| #1                                | neck OR back OR shoulder OR lumbar OR spine OR spinal                                                            | 640 124         |
| #2                                | pain OR ache                                                                                                     | 480 193         |
| #3                                | factor* OR prognos*                                                                                              | 2 855 696       |
| #4                                | “return* to work” OR “return-to-work” OR “job re-entry” OR “work absence” OR “work ability” OR “ability to work” | 9 146           |
| #1 AND #2                         |                                                                                                                  | 96 755          |
| #1 AND #2 AND #3                  |                                                                                                                  | 14 969          |
| #1 AND #2 AND #3 AND #4           |                                                                                                                  | 412             |
| #1 AND #2 AND #3 AND #4 NOT acute |                                                                                                                  | 342             |

### Search history from CINAHL:

| Search                            | Search words                                                                                                     | No. of articles |
|-----------------------------------|------------------------------------------------------------------------------------------------------------------|-----------------|
| #1                                | neck OR back OR shoulder OR lumbar OR spine OR spinal                                                            | 114,940         |
| #2                                | pain OR ache                                                                                                     | 140,366         |
| #3                                | factor* OR prognos*                                                                                              | 697,302         |
| #4                                | “return* to work” OR “return-to-work” OR “job re-entry” OR “work absence” OR “work ability” OR “ability to work” | 6,483           |
| #1 AND #2                         |                                                                                                                  | 35,759          |
| #1 AND #2 AND #3                  |                                                                                                                  | 8,895           |
| #1 AND #2 AND #3 AND #4           |                                                                                                                  | 370             |
| #1 AND #2 AND #3 AND #4 NOT acute |                                                                                                                  | 312             |

### Search history from PsycINFO:

| Search                            | Search words                                                                                                     | No. of articles |
|-----------------------------------|------------------------------------------------------------------------------------------------------------------|-----------------|
| #1                                | neck OR back OR shoulder OR lumbar OR spine OR spinal                                                            | 86,952          |
| #2                                | pain OR ache                                                                                                     | 92,828          |
| #3                                | factor* OR prognos*                                                                                              | 848,437         |
| #4                                | “return* to work” OR “return-to-work” OR “job re-entry” OR “work absence” OR “work ability” OR “ability to work” | 4,265           |
| #1 AND #2                         |                                                                                                                  | 16,448          |
| #1 AND #2 AND #3                  |                                                                                                                  | 4,646           |
| #1 AND #2 AND #3 AND #4           |                                                                                                                  | 148             |
| #1 AND #2 AND #3 AND #4 NOT acute |                                                                                                                  | 115             |

\* , Used for single key word; “”, used if more than a key word.
