# Supplementary material for: Factors associated with return to work among people on work absence due to long-term neck or back pain: a narrative systematic review
Source: PubMed Central journal article supplement — BMJ Open. 2017 Jul 2;7(6):e014939. doi: 10.1136/bmjopen-2016-014939 (PMC5734441; doi:10.1136/bmjopen-2016-014939), 2017-07-02
Supplement: bmjopen-2016-014939supp002.pdf [file bmjopen-2016-014939supp002.pdf]

## Appendix- II

| <b>Reasons of exclusion</b>                                                                 | <b>Number of full-texts</b> |
|---------------------------------------------------------------------------------------------|-----------------------------|
| Wrong population                                                                            | 16                          |
| Work absence due to acute pain or trauma                                                    | 11                          |
| Non-observational studies (e.g., review/met-analysis, intervention study or clinical trial) | 4                           |
| Work absence duration was not clear                                                         | 4                           |
| Outcome not RTW                                                                             | 3                           |
| Confounding rehabilitation program                                                          | 2                           |
| Instrumental validation                                                                     | 2                           |
| Not in English language                                                                     | 2                           |
